# Supplementary material
Source: PubMed Central journal article supplement (PMC4242466)

**Fig. S1 Time course of intracellular or medium levels of H<sub>2</sub>S.** Intracellular or medium fluorescent intensity (FI<sub>HSip-1</sub>) was measured at 1.5 h, 3 h, or, 6 h after the addition of H<sub>2</sub>S donor to the medium loaded by a H<sub>2</sub>S probe HSip-1 (panels A-D). \* *P* < 0.05 vs. baseline at the same time point.

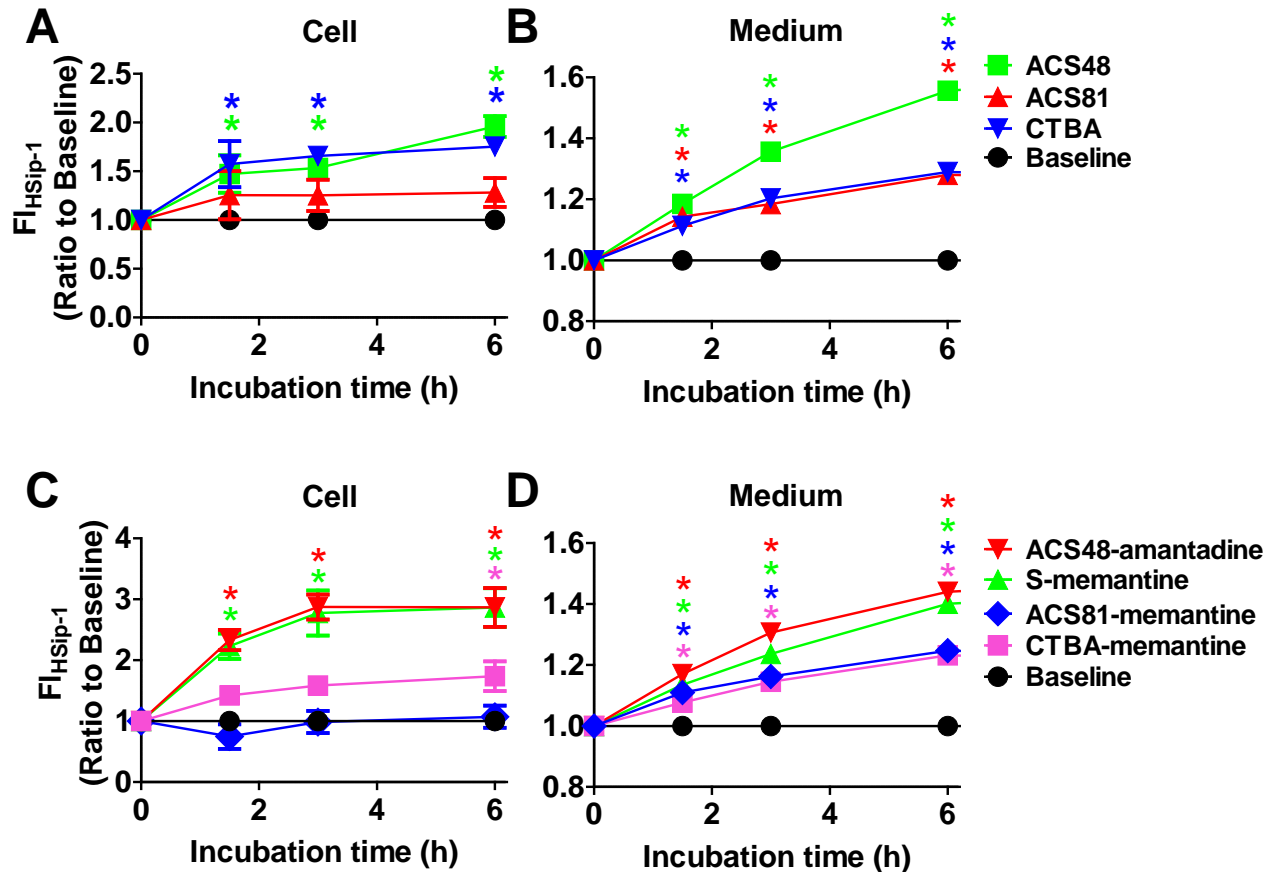

**Fig. S2 Time course of intracellular or medium levels of sulfane sulfur.**

Intracellular or medium fluorescent intensity ( $FI_{SSP4}$ ) was measured at 1.5 h, 3 h, or 6 h after the addition of  $H_2S$  donor to the medium loaded by a sulfane sulfur probe SSP4 (panels A-D). \*  $P < 0.05$  vs. baseline at the same time point.

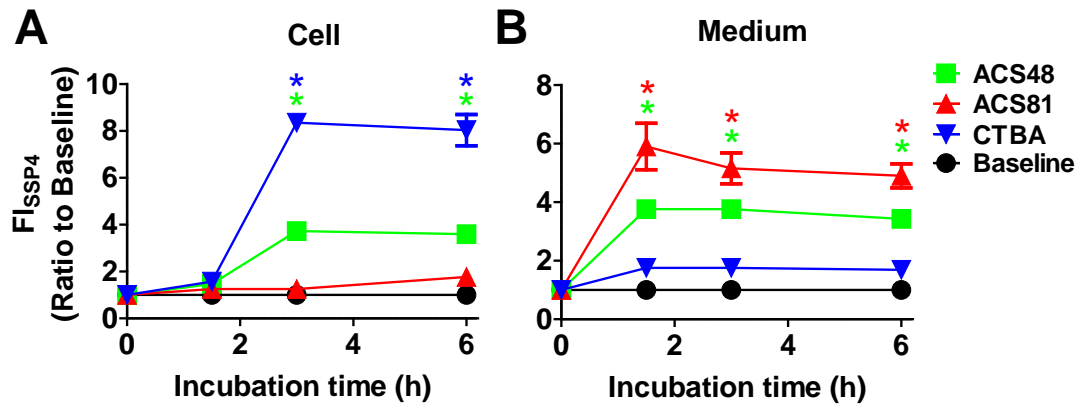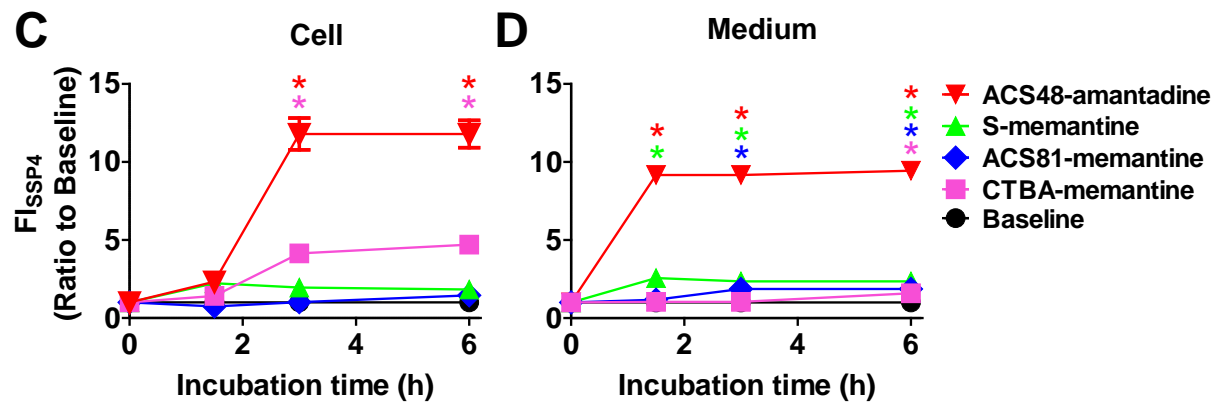

**Fig. S3 Structure of SSP4.**

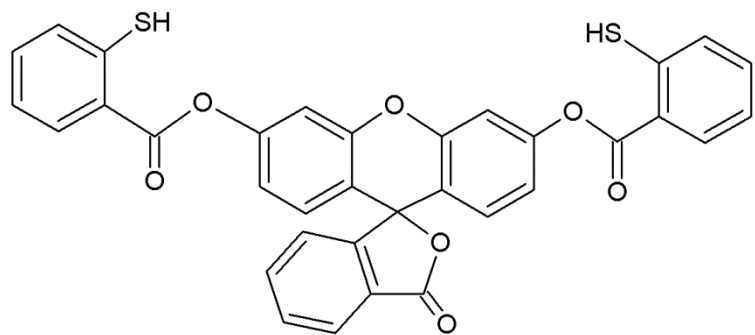

Supplement: NIHMS622912-supplement-ESI.pdf [file NIHMS622912-supplement-ESI.pdf]
